# Supplementary material
Source: publisher site journal article supplement (https://mbmg.pensoft.net/article/87415/download/suppl/32/)
Supplement: Supplementary file 1

# *E. japonicus*

North

South

East

West

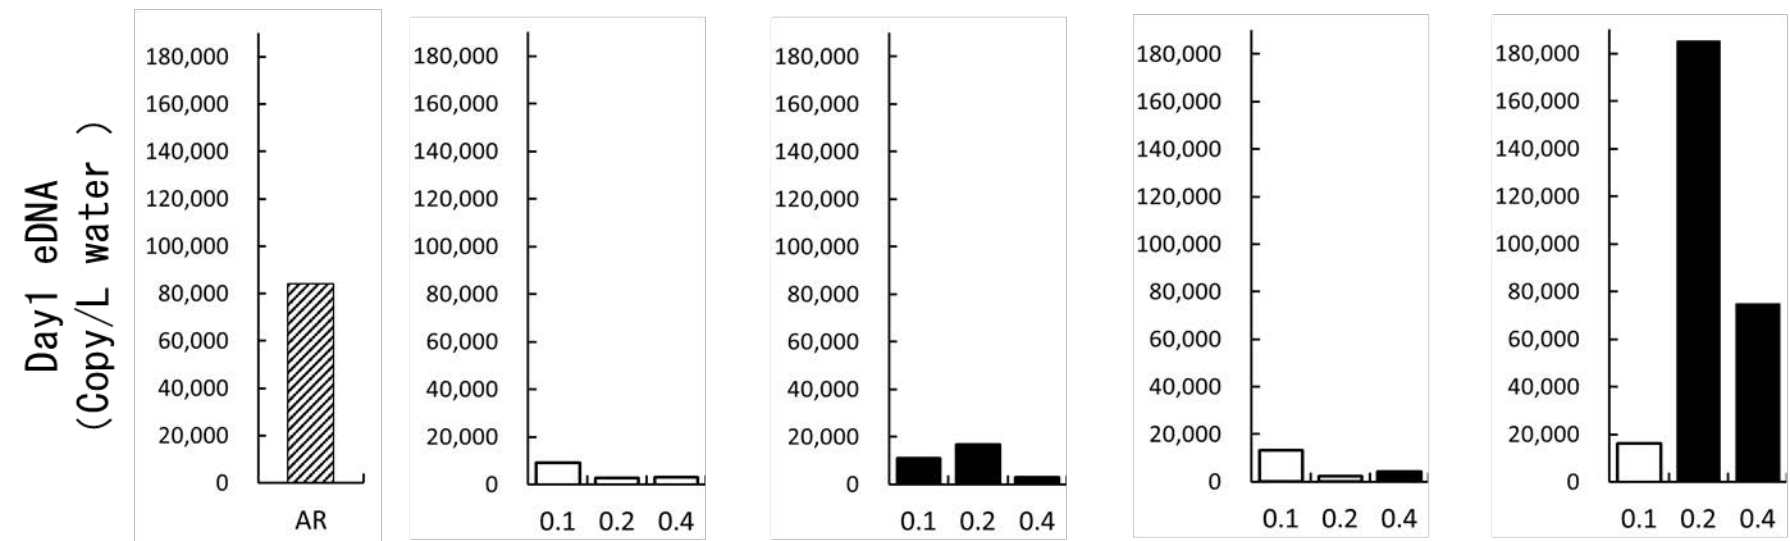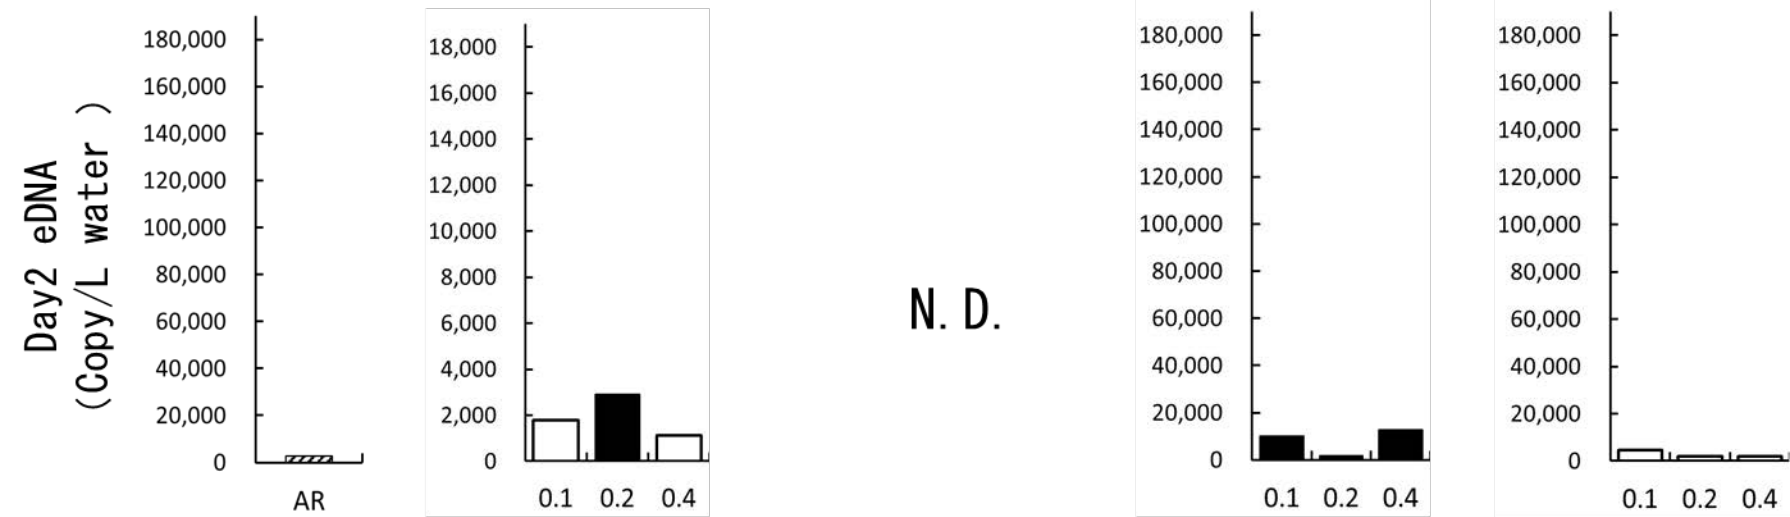

*Dist* (Mile)

*P. trilineatum*

North

South

East

West

Day1 eDNA  
(Copy/L water )

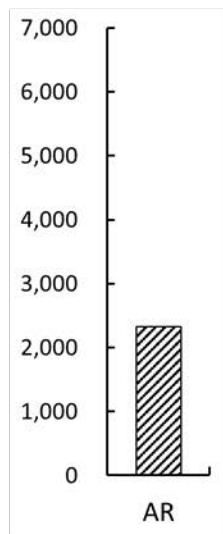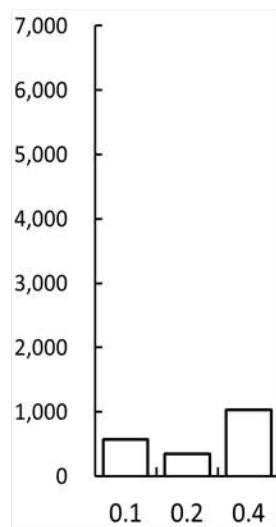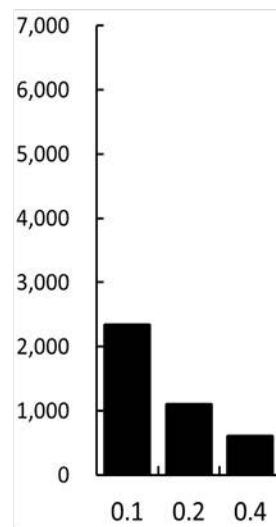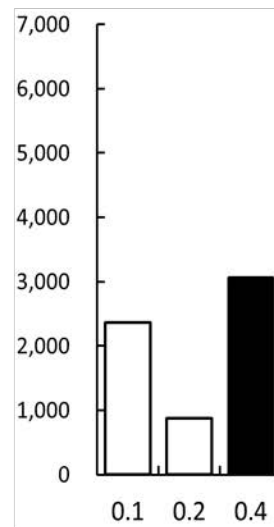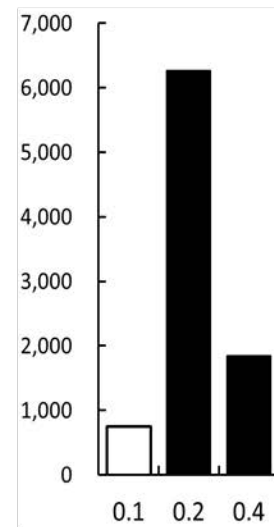

Day2 eDNA  
(Copy/L water )

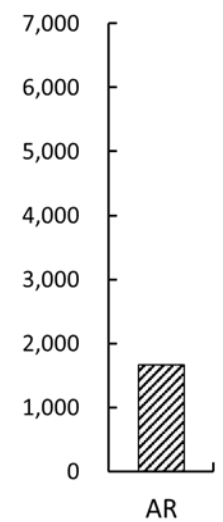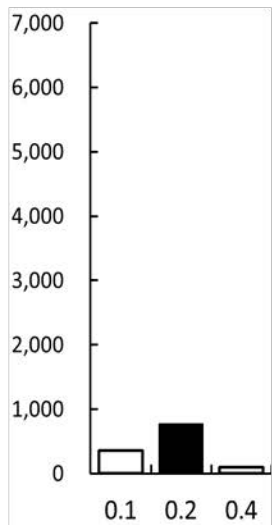

N. D.

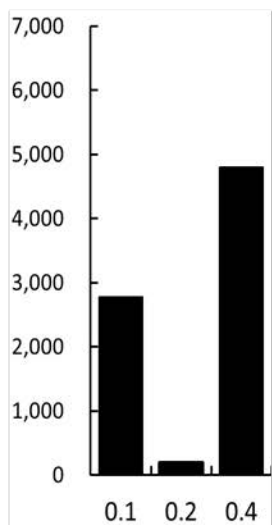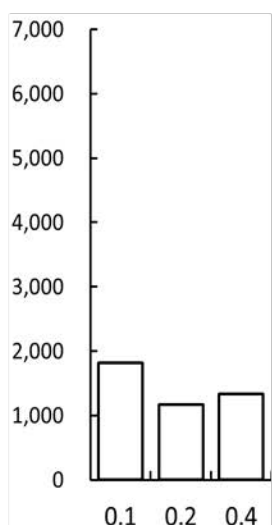

*Dist* (Mile)

*Scomber* spp

North

South

East

West

Day1 eDNA  
(Copy/L water )

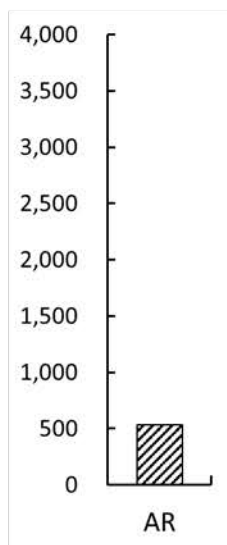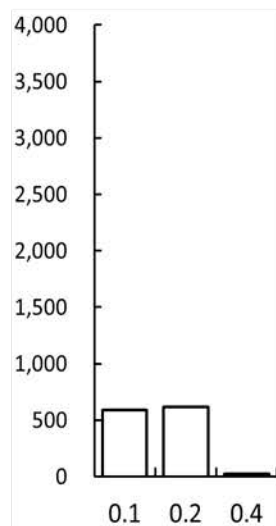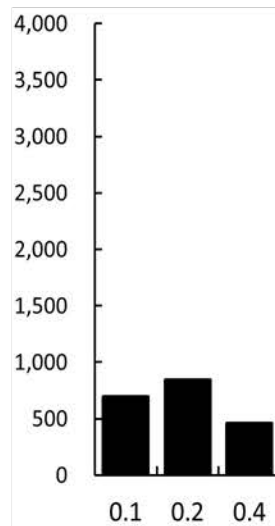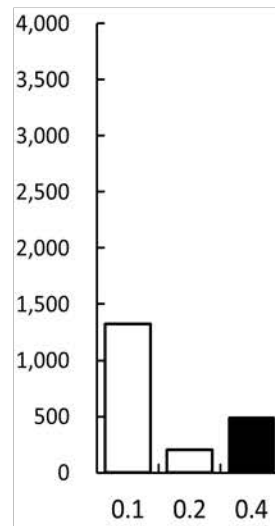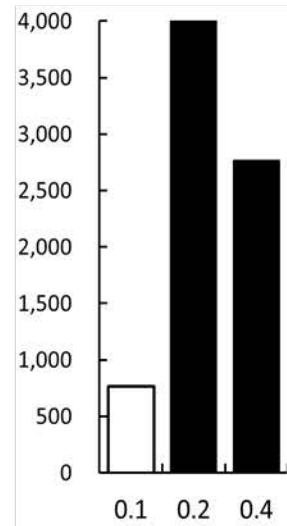

Day2 eDNA  
(Copy/L water )

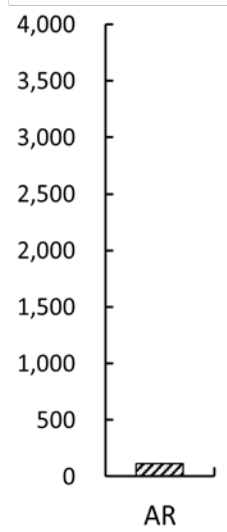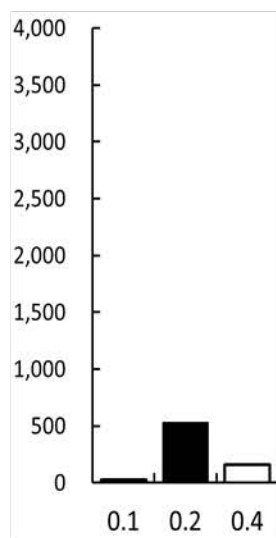

N. D.

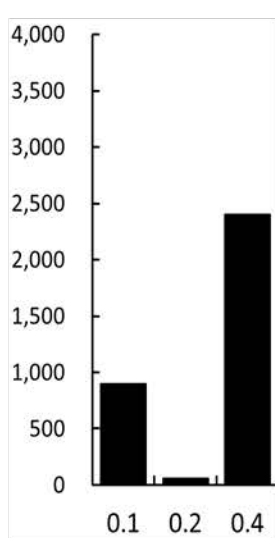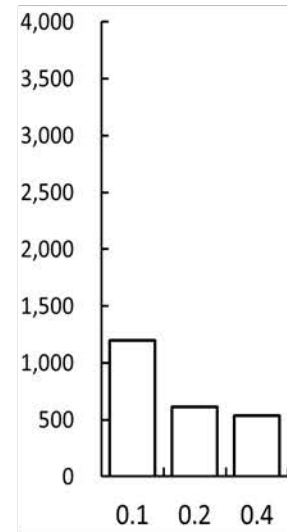

*Dist* (Mile)

*T. japonicus*

North

South

East

West

Day1 eDNA  
(Copy/L water )

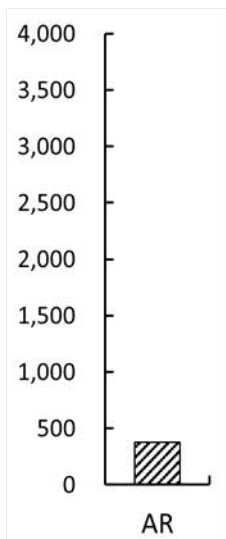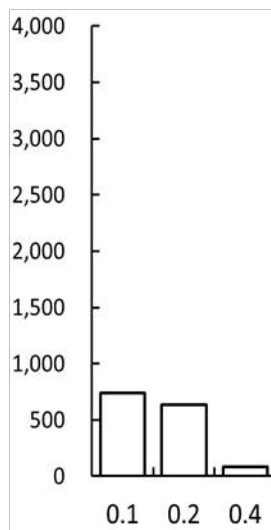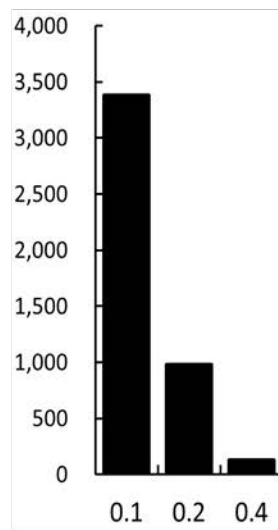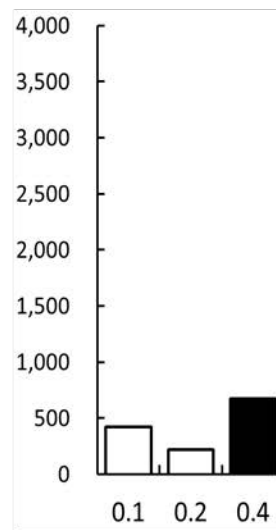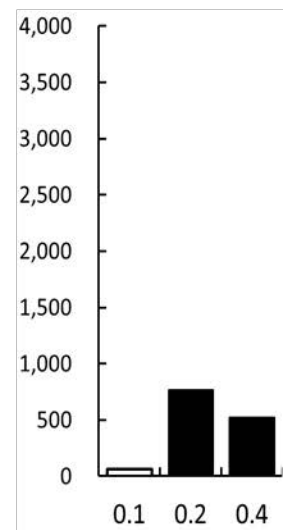

Day2 eDNA  
(Copy/L water )

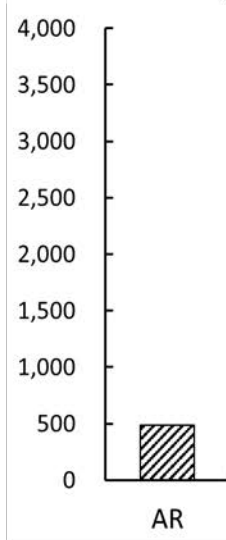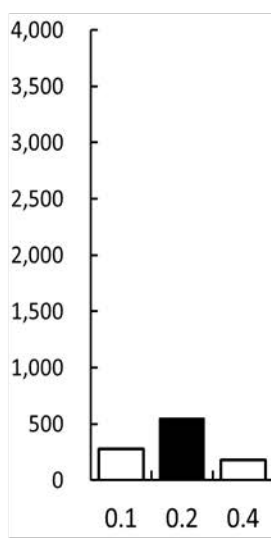

N. D.

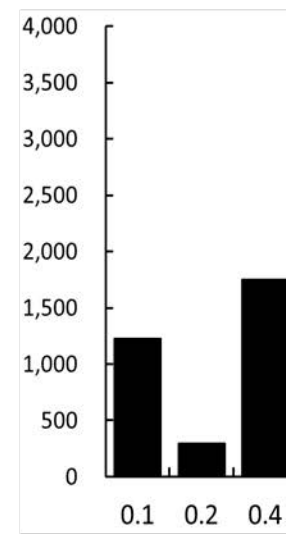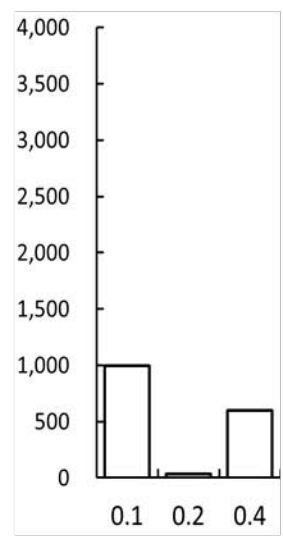

*Dist* (Mile)
